# Supplementary material
Source: PubMed Central journal article supplement (PMC6752207)
Supplement: NIHMS1538897-supplement-3.pdf [file NIHMS1538897-supplement-3.pdf]

*Supplemental Figures*

Figure S1

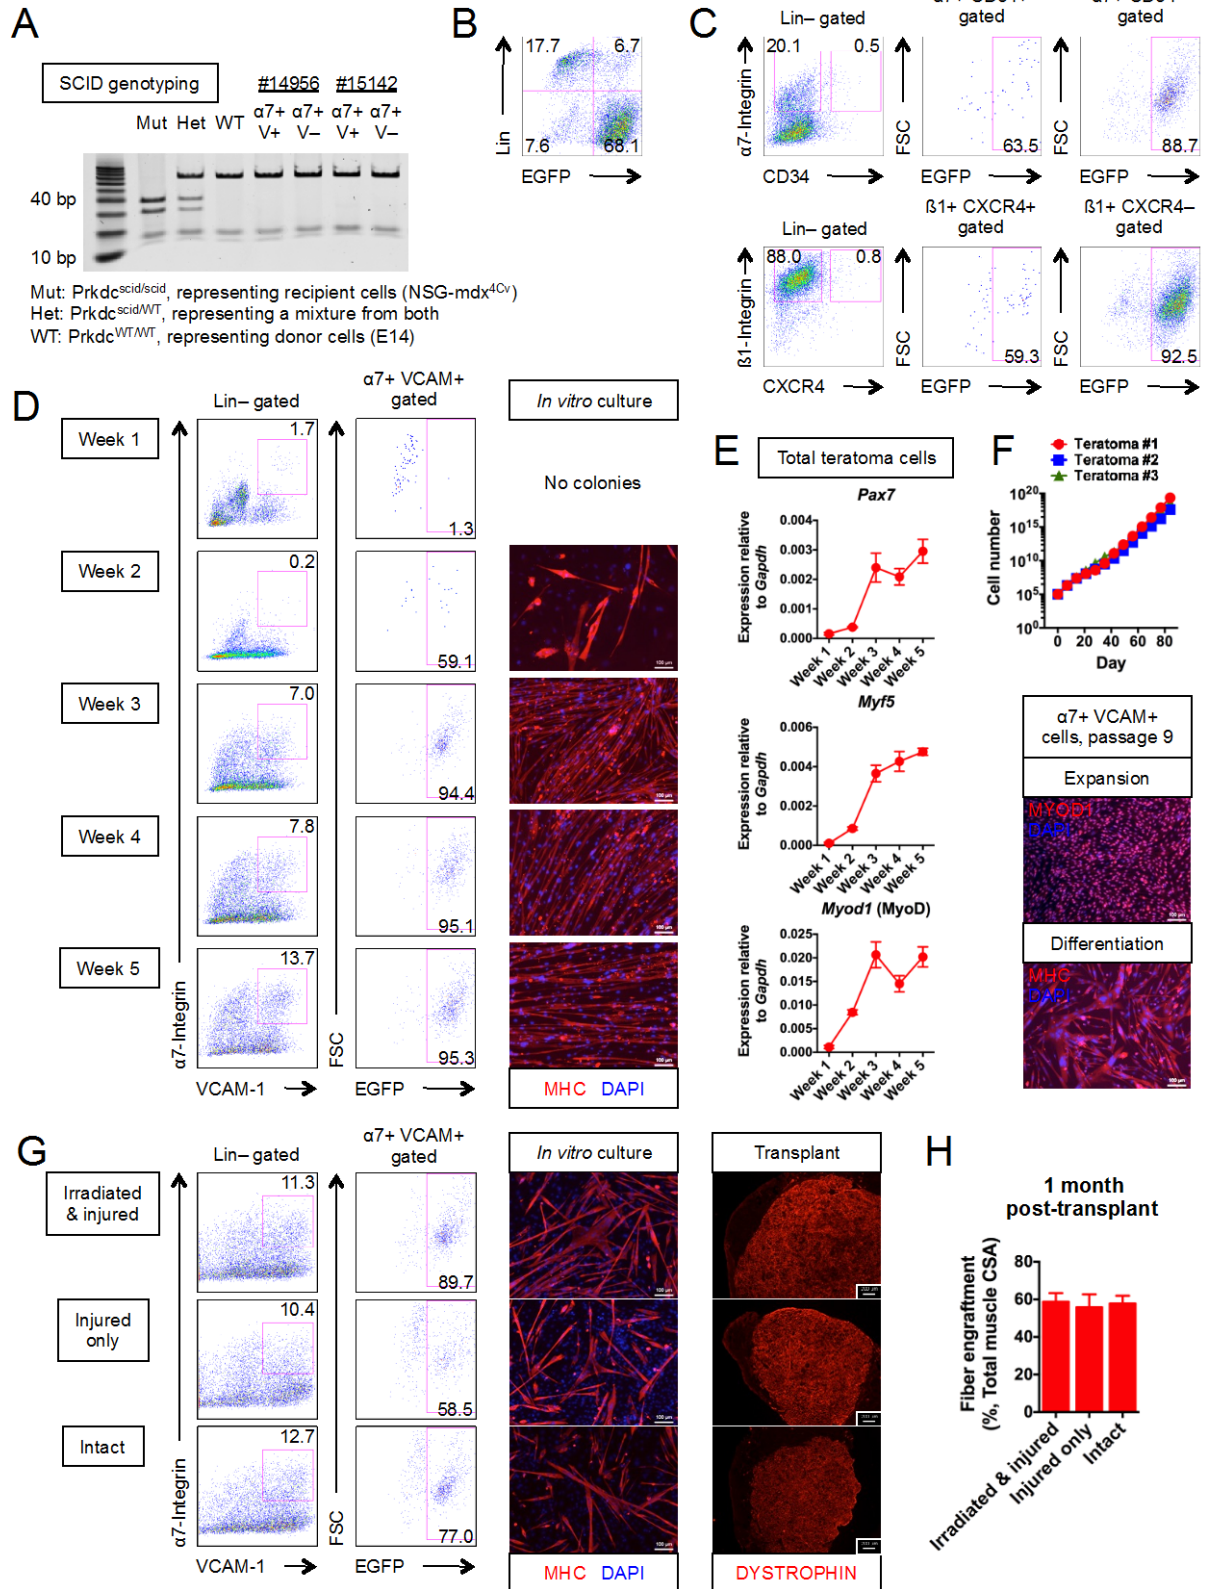

**Figure S1, related to Figure 1. Characterization of E14-EGFP ES cell-derived teratomas**

(A) SCID genotyping of sorted  $\alpha7^+$  VCAM<sup>+</sup> and  $\alpha7^+$  VCAM<sup>-</sup> cells from 2 teratomas (mouse #14956 and mouse #15142) verifying that these myogenic populations were donor-derived (no scid allele) (n=2 biological replicates).

(B) Abundant Lin<sup>+</sup> (CD45<sup>+</sup> and/or CD31<sup>+</sup>) EGFP<sup>-</sup> host cells were found in E14-EGFP ES cell-derived teratomas, indicating host contribution to teratoma development (n=2 biological replicates).

(C) Characterization of 3 week-old teratomas derived from E14-EGFP ES cells using other satellite cell markers (n=2 biological replicates).

(D) Donor-derived myogenic progenitors emerged in 2 week-old teratomas and beyond, as indicated by FACS and immunostaining in  $\alpha7^+$  VCAM<sup>+</sup> EGFP<sup>+</sup> sorted cells (n=3 biological replicates). Scale bar represents 100  $\mu$ m.

(E) Quantitative RT-PCR of myogenic genes from total teratoma cells at different time points (n=3 biological replicates).

(F) *Ex vivo* culture of  $\alpha7^+$  VCAM<sup>+</sup> teratoma cells shows exponential growth up to passage 12 (top). Immunostaining showing expanded  $\alpha7^+$  VCAM<sup>+</sup> teratoma cells retain their myogenic identity at both expansion phase (MYOD1<sup>+</sup>) and differentiation phase (MHC<sup>+</sup>) even at passage 9 (bottom) (n=3 biological replicates). Scale bar represents 100  $\mu$ m.

(G) Myogenic progenitors could be generated in teratomas developed in irradiated and injured TAs (control), injured only TAs, and intact TAs (non-irradiated and non-injured), but the injured and irradiated niche allowed the greatest donor contribution (EGFP<sup>+</sup>). Sorted  $\alpha7^+$  VCAM<sup>+</sup> cells from all 3 conditions produced MHC<sup>+</sup> myotubes in culture (n=2 biological replicates) and similar numbers of DYSTROPHIN<sup>+</sup> fibers at 1 month after transplantation of 40,000 cells (n=4 biological replicates). Scale bar represents 100  $\mu$ m for culture or 200  $\mu$ m for transplant.

(H) Quantification of fiber engraftment in (G) (n=4 biological replicates).

$\alpha7$ ,  $\alpha7$ -integrin. V and VCAM, VCAM-1. CSA, cross-sectional area. ES cells, embryonic stem cells. Lin, lineage cocktail comprising antibodies against CD45 (hematopoietic) and CD31 (endothelial). Mut, mutant; Het, heterozygous; WT, wild-type; TA, tibialis anterior. Mean  $\pm$  SEM is shown in (E) and (H).

Figure S2

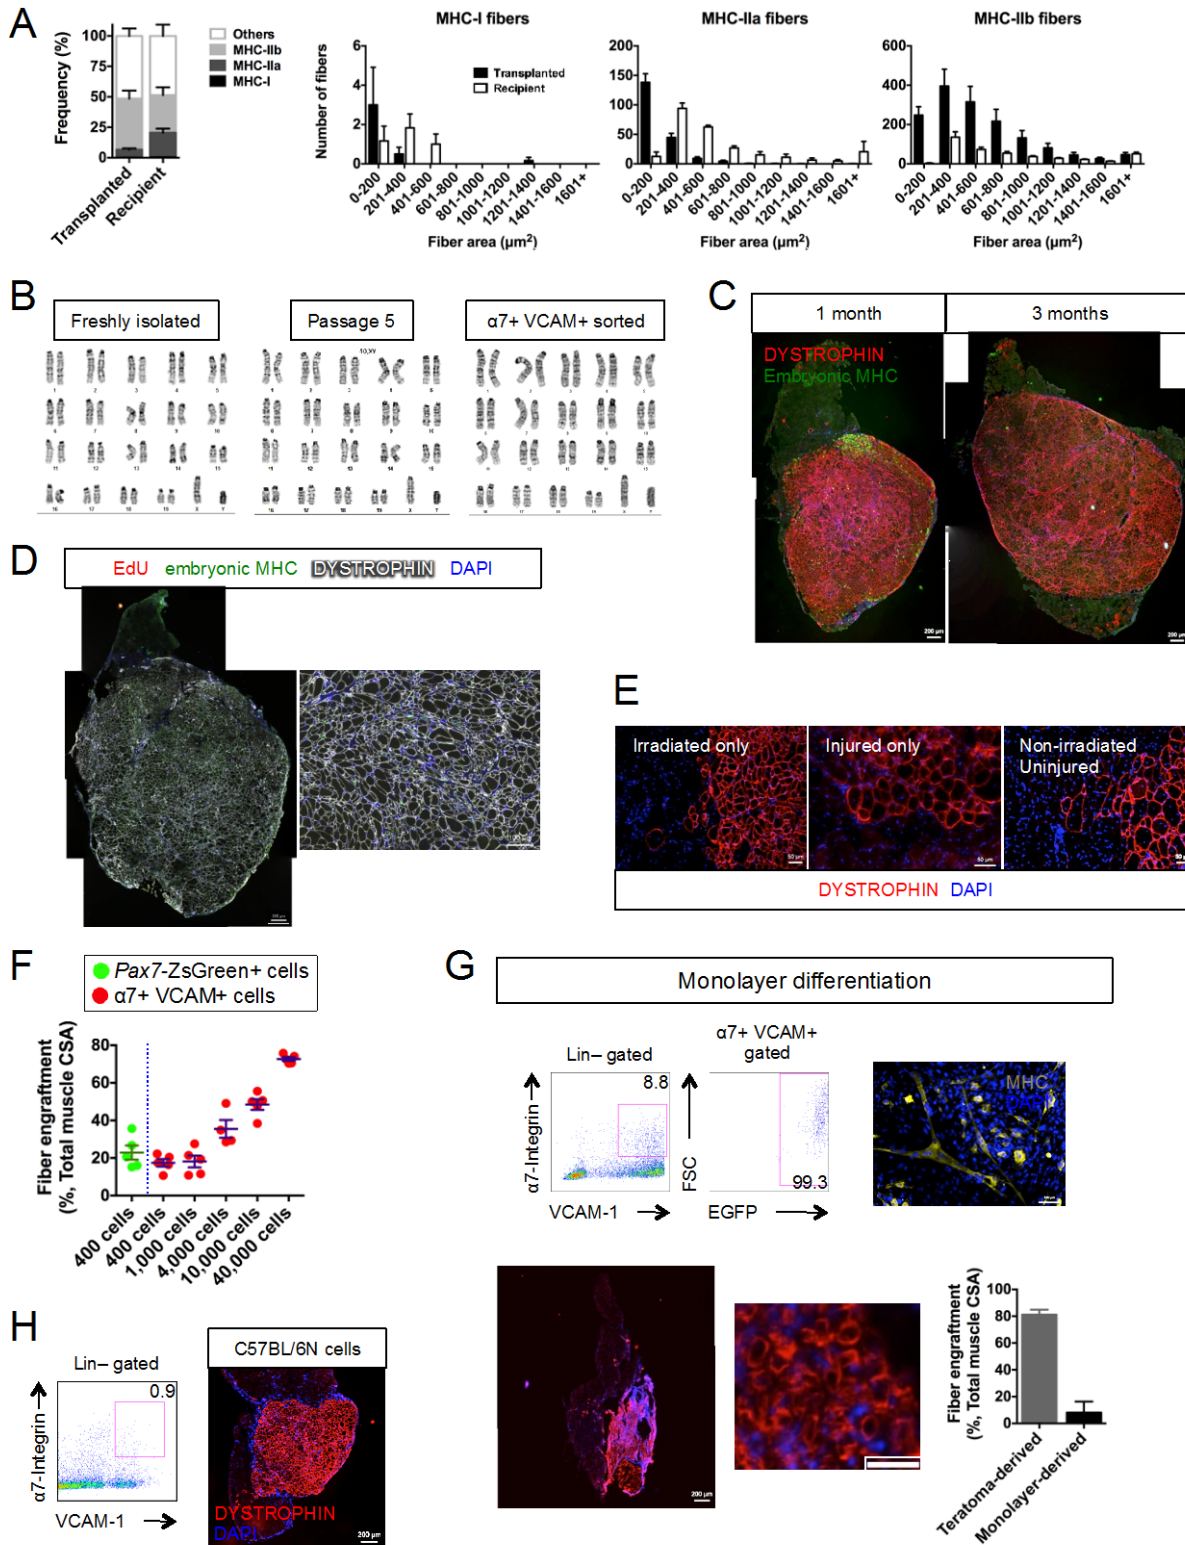

**Figure S2, related to Figures 2 and 3. Characterization of teratoma-derived  $\alpha 7+$  VCAM+ cells**

(A) Fiber phenotyping analysis of transplanted and recipient TA muscles. Composition of different fiber types (far left), and area quantification for fibers expressing MHC-I (middle left), MHC-IIa (middle right) and MHC-IIb (far right) (n=6 biological replicates).

(B) Karyotype analysis of freshly isolated teratoma cells (left), serially passaged teratoma cells (P5, middle) and  $\alpha 7+$  VCAM+ sorted cells (right) (n=3 biological replicates). All are karyotypically normal, i.e., teratoma formation *per se* does not generate karyotypically abnormal cells.

(C) Engrafted fibers mature over time. Embryonic MHC was found in only a minor fraction of DYSTROPHIN+ fibers by 1 month post-transplant (left) but no longer detected by 3 months (right) (n=6 biological replicates). Scale bar represents 200  $\mu\text{m}$ .

(D) Engrafted mononuclear  $\alpha 7+$  VCAM+ cells become quiescent. Three months after primary transplantation, EdU was injected for 3 days and muscles were harvested 5 weeks later. The lack of EdU positivity in DYSTROPHIN+ fibers indicates that transplanted  $\alpha 7+$  VCAM+ cells are quiescent (n=4 biological replicates). Scale bar represents 200  $\mu\text{m}$  (left) or 100  $\mu\text{m}$  (right, magnified image).

(E)  $\alpha 7+$  VCAM+ cells engrafted and formed DYSTROPHIN+ fibers in irradiated-only (left), injured-only (middle) and non-irradiated uninjured recipient TA muscles (right) (n=2–6 biological replicates). Scale bar represents 50  $\mu\text{m}$

(F) Fiber engraftment of Pax7-ZsGreen satellite cells and  $\alpha 7+$  VCAM+ teratoma cells (n=4–5 biological replicates), from which a dose-response relationship of  $\alpha 7+$  VCAM+ cells is generated and displayed in Figure 2I (n=4–5 biological replicates).

(G) Comparison of teratoma-derived vs. monolayer *in vitro* differentiation-derived myogenic cells. Myogenic progenitors were generated side by side using the teratoma method or the monolayer method (Chal et al., 2015). By 4 weeks, cells were analyzed by FACS (upper left) and  $\alpha 7+$  VCAM+ cells were sorted for further culture and immunostaining (upper right, n=8 biological replicates) or for transplantation (40,000 cells per TA muscle, n=3 biological replicates). Transplanted muscles were harvested 3 months later. Despite having similar myogenic potential *in vitro*, monolayer differentiated  $\alpha 7+$  VCAM+ cells have poorer engraftment potential *in vivo* (bottom left: whole TA muscle; bottom middle: magnified area; bottom right: quantification). Scale bar represents 100  $\mu\text{m}$  (cultured cells), 200  $\mu\text{m}$  (whole TA muscle) or 25  $\mu\text{m}$  (magnified area).

(H)  $\alpha 7+$  VCAM+ myogenic cells are generated from C57BL/6N ES cell teratomas. FACS profile showing the presence of  $\alpha 7+$  VCAM+ cells in 3-week-old teratoma generated from C57BL/6N-PXR-B6N

#1 ES cells (left). Subsequent transplantation of 20,000 FACS-sorted  $\alpha 7^+$  VCAM<sup>+</sup> cells forms DYSTROPHIN<sup>+</sup> muscle fibers (right) (n=3 biological replicates). Scale bar represents 200  $\mu$ m.

$\alpha 7$ ,  $\alpha 7$ -integrin. VCAM, VCAM-1. Lin, lineage cocktail comprising antibodies against CD45 (hematopoietic) and CD31 (endothelial). MHC, myosin heavy chain. Mean  $\pm$  SEM is shown in (A), (F) and (G).

Figure S3

A

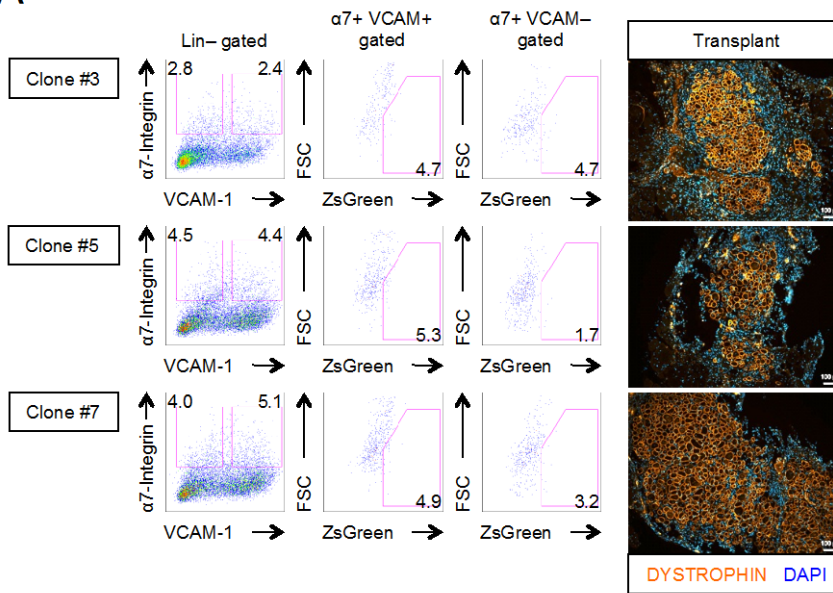

B

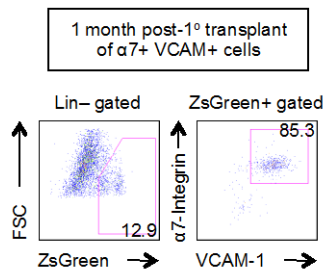

**Figure S3, related to Figure 4. Characterization of Pax7-ZsGreen iPS cell-derived teratomas**

(A) Three different *Pax7*-ZsGreen iPS clones were tested for their potential to generate  $\alpha7^+$  VCAM<sup>+</sup> cells in teratomas and subsequent DYSTROPHIN<sup>+</sup> fibers after transplantation. All 3 clones produced  $\alpha7^+$  VCAM<sup>+</sup> and  $\alpha7^+$  VCAM<sup>-</sup> myogenic progenitors in teratomas, but ZsGreen was minimally expressed (n=2 biological replicates per clone). Sorted  $\alpha7^+$  VCAM<sup>+</sup> cells from all 3 clones engrafted into DYSTROPHIN<sup>+</sup> fibers 1-month post-transplant (n=4 biological replicates per clone). Scale bar represents 100  $\mu$ m. Note that the FACS plots and immunostaining image for clone #7 was used in Figures 4B and 4E, respectively.

(B) FACS analysis of transplanted muscles revealed the presence of ZsGreen<sup>+</sup> muscle stem cells, of which most are within the  $\alpha7^+$  VCAM<sup>+</sup> gate (n=10 biological replicates).

iPS cells, induced pluripotent stem cells. Lin, lineage cocktail comprising antibodies against CD45 (hematopoietic) and CD31 (endothelial).



Figure S4

A

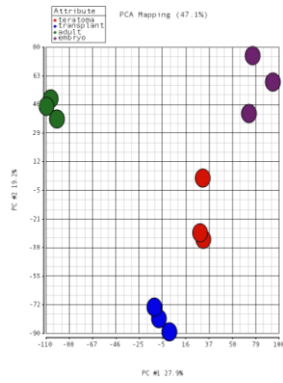

B

| GO terms                     | Teratoma up vs. Embryo |
|------------------------------|------------------------|
| Immune response              | $6.41 \times 10^{-41}$ |
| Response to cytokine         | $1.40 \times 10^{-39}$ |
| Regulation of cell migration | $9.63 \times 10^{-25}$ |
| Regulation of cell motility  | $4.06 \times 10^{-24}$ |

C

| GO terms                           | Transplant up vs. Adult |
|------------------------------------|-------------------------|
| Muscle structure development       | $8.76 \times 10^{-14}$  |
| Muscle tissue development          | $8.31 \times 10^{-12}$  |
| Striated muscle tissue development | $9.22 \times 10^{-11}$  |
| Muscle organ development           | $3.67 \times 10^{-10}$  |

***Figure S4, related to Figure 5. Transcriptome analysis of teratoma and transplanted  $\alpha 7^+$  VCAM+ cells***

(A) Principal Component Analysis (PCA) highlighting the differences among the 4  $\alpha 7^+$  VCAM+ populations: *Teratoma*, *Transplant*, *Embryo* and *Adult*.

(B) Gene Ontology (GO) Biological Process terms denoting genes enriched in the *Teratoma-Embryo* comparison. p-values of the GO terms are indicated.

(C) Gene Ontology (GO) Biological Process terms denoting genes enriched in the *Transplant-Adult* comparison. p-values of the GO terms are indicated.
